# Supplementary material for: CD74 and intratumoral immune response in breast cancer
Source: PubMed Central journal article supplement (PMC5355043; doi:10.18632/oncotarget.8610), 2016-04-06
Supplement: oncotarget-08-12664-s001.pdf [file oncotarget-08-12664-s001.pdf]

## CD74 and intratumoral immune response in breast cancer

### Supplementary Materials

**Supplementary Table S1: Relapse free survival and overall survival univariate log-rank and cox regression analysis for association of clinical parameters and CD74 or MHCII status in all cases**

| A. Recurrence free survival |                                 | Univariate       |                 | Multivariate     |              |
|-----------------------------|---------------------------------|------------------|-----------------|------------------|--------------|
| Parameter                   | Comparison                      | HR (95% CI)      | p-value         | HR (95% CI)      | p-value      |
| Age at diagnosis (yrs)      | > 35 vs ≤ 35                    | 0.46 (0.22–0.92) | <b>0.025</b>    | 0.47 (0.20–1.10) | 0.082        |
| Tumour size (cm)            | > 2 cm vs ≤ 2 cm                | 2.15 (1.42–2.58) | < <b>0.0001</b> | 1.99 (1.30–3.04) | <b>0.001</b> |
| Nodal status                | pos vs neg                      | 1.99 (1.52–2.65) | < <b>0.0001</b> | 2.07 (1.47–2.92) | <b>0.000</b> |
| Tumor grade                 | 2 vs 1                          | 1.47 (0.98–2.04) | 0.067           | 0.87 (0.46–1.66) | 0.674        |
|                             | 3 vs 1                          | 1.78 (1.23–2.73) | <b>0.013</b>    | 1.47 (0.93–2.33) | 0.102        |
| ER status                   | pos vs neg                      | 0.44 (0.30–0.53) | < <b>0.0001</b> | 0.61 (0.36–1.05) | 0.075        |
| PR status                   | pos vs neg                      | 0.44 (0.33–0.56) | < <b>0.0001</b> | 0.59 (0.39–0.89) | <b>0.012</b> |
| Molecular subtypes          | Luminal A vs Basal-like         | 0.29 (0.17–0.48) | < <b>0.0001</b> | 1.63 (0.80–3.36) | 0.182        |
|                             | Luminal B vs Basal-like         | 0.68 (0.41–1.10) | 0.121           | 1.01 (0.45–2.25) | 0.986        |
|                             | Her2 vs Basal-like              | 1.20 (0.78–1.85) | 0.401           | 0.49 (0.25–0.95) | <b>0.036</b> |
|                             | TNNB <sup>a</sup> vs Basal-like | 0.80 (0.47–1.39) | 0.444           | 1.51 (0.75–3.02) | 0.248        |
| CD74 expression             | high vs low                     | 0.82 (0.61–1.10) | 0.175           | 0.71 (0.47–1.07) | 0.105        |
| MHCII expression            | high vs low                     | 0.89 (0.52–1.53) | 0.691           | 0.81 (0.52–1.28) | 0.375        |
| B. Overall survival         |                                 | Univariate       |                 | Multivariate     |              |
| Parameter                   | Comparison                      | HR (95% CI)      | p-value         | HR (95% CI)      | p-value      |
| Age at diagnosis (yrs)      | > 35 vs ≤ 35                    | 0.46 (0.10–0.93) | <b>0.007</b>    | 0.61 (0.25–1.51) | 0.285        |
| Tumour size (cm)            | > 2 cm vs ≤ 2 cm                | 1.77 (1.19–2.36) | <b>0.003</b>    | 1.78 (1.13–2.80) | <b>0.012</b> |
| Nodal status                | pos vs neg                      | 1.83 (1.36–2.46) | < <b>0.0001</b> | 1.86 (1.29–2.67) | <b>0.001</b> |
| Tumor grade                 | 2 vs 1                          | 1.52 (0.97–2.16) | 0.071           | 0.71 (0.44–1.14) | 0.363        |
|                             | 3 vs 1                          | 2.41 (1.47–3.60) | <b>0.0003</b>   | 1.38 (0.87–2.21) | 0.175        |
| ER status                   | pos vs neg                      | 0.32 (0.20–0.37) | < <b>0.0001</b> | 0.52 (0.29–0.92) | <b>0.025</b> |
| PR status                   | pos vs neg                      | 0.36 (0.26–0.47) | < <b>0.0001</b> | 0.59 (0.37–0.94) | <b>0.026</b> |
| Molecular subtypes          | Luminal A vs Basal-like         | 0.24 (0.07–0.20) | < <b>0.0001</b> | 1.48 (0.72–3.03) | 0.284        |
|                             | Luminal B vs Basal-like         | 0.50 (0.30–0.80) | <b>0.005</b>    | 0.26 (0.13–0.53) | <b>0.000</b> |
|                             | Her2 vs Basal-like              | 0.99 (0.65–1.51) | 0.955           | 0.58 (0.28–1.24) | 0.160        |
|                             | TNNB <sup>a</sup> vs Basal-like | 0.74 (0.44–1.27) | 0.283           | 1.21 (0.60–2.43) | 0.593        |
| CD74 expression             | high vs low                     | 0.82 (0.61–1.13) | 0.240           | 0.71 (0.46–1.10) | 0.122        |
| MHCII expression            | high vs low                     | 0.85 (0.49–1.51) | 0.597           | 0.83 (0.51–1.33) | 0.436        |

<sup>a</sup>TNNB = Triple Negative Non-basal.

**Supplementary Table S2: A report concerning the source of the biospecimen and data using the BRISQ guidelines [44]**

|                                                                                                                                                                                                                                                                                                                                                                                                                                                                                                                                                                                                                                                                                                                                                                                                                                                                                                                                                                                                                                                                                                  |
|--------------------------------------------------------------------------------------------------------------------------------------------------------------------------------------------------------------------------------------------------------------------------------------------------------------------------------------------------------------------------------------------------------------------------------------------------------------------------------------------------------------------------------------------------------------------------------------------------------------------------------------------------------------------------------------------------------------------------------------------------------------------------------------------------------------------------------------------------------------------------------------------------------------------------------------------------------------------------------------------------------------------------------------------------------------------------------------------------|
| <p><b>BRISQ Report ID : 40</b></p>                                                                                                                                                                                                                                                                                                                                                                                                                                                                                                                                                                                                                                                                                                                                                                                                                                                                                                                                                                                                                                                               |
| <p><b>Profile</b><br/>           Study Name: CD74<br/>           Biobank Name: PWATSON<br/>           Datetime Created: 10-Dec-2015 9:09 pm</p>                                                                                                                                                                                                                                                                                                                                                                                                                                                                                                                                                                                                                                                                                                                                                                                                                                                                                                                                                  |
| <p><b>Pre-Acquisition</b><br/>           Biospecimen Type: Tissue (not otherwise specified)<br/>           Anatomical Site: breast<br/>           Disease Status of Participants: primary cancer specimens from breast cancer patients<br/>           Clinical Characteristics Of Participants: invasive breast cancer<br/>           Vital State Of Participants: alive<br/>           Disease State: outcomes data provided by MBTB bank<br/>           Cause of Death: n/a<br/>           Agonal State: n/a<br/>           Diagnosis: invasive breast cancer<br/>           Clinical: primary breast cancer<br/>           Pathology: invasive carcinoma, NOS<br/>           Time Between Diagnosis And Sampling: typical pathology service times, 0.5–2 hrs<br/>           Exposures: none<br/>           Reproductive Status: unknown<br/>           Patient Demographic Information: female<br/>           Accrual Scheme: tumor bank generalized collection scheme....all available breast cancer specimens<br/>           Nature Biobanking Institutions: Manitoba Breast Tumor Bank</p> |
| <p><b>Acquisition</b><br/>           Collection Mechanism : surgical resection specimens<br/>           Time From Cessation Blood Flow <i>In Vivo</i> To Biospecimen Excision: unknown<br/>           Time From Biospecimen Excision Acquisition To Stabilization: typical pathology service times, 0.5–2 hrs<br/>           Temperature Between Biospecimen Excision Acquisition and Stabilization: RT<br/>           Collection Container : unknown</p>                                                                                                                                                                                                                                                                                                                                                                                                                                                                                                                                                                                                                                        |
| <p><b>Stabilization and Preservation</b><br/>           Mechanism of Stabilization: frozen specimens, prior to conversion to FFPE blocks<br/>           Type of Long Term Preservation : formalin fixed paraffin embedded<br/>           Constitution of Preservative: 10% neutral buffered formalin<br/>           Time in Fixative Preservation Solution: unknown<br/>           Temperature During Time in Preservation Solution: unknown<br/>           Aliquot Volume: n/a<br/>           Specimen Size: typical clinical blocks</p>                                                                                                                                                                                                                                                                                                                                                                                                                                                                                                                                                        |
| <p><b>Storage and Handling</b><br/>           Storage Temperature: room temp<br/>           Storage Duration: up to 20 yrs<br/>           Storage Details: unknown<br/>           Type of Storage Container: unknown<br/>           Type of Slide: charged glass for IHC<br/>           Shipping Parameters: unknown<br/>           Shipping Duration: unknown<br/>           Type of Transport Container: unknown<br/>           Shipping Temperature: room temp<br/>           Freeze Thaw Parameters:<br/>           Number of Freeze Thaw Cycles: n/a<br/>           Duration of Thaw Events: All FFPE blocks created from previously frozen specimens by immersion of frozen aliquot in formalin<br/>           Time from Last Thaw to Processing: unknown</p>                                                                                                                                                                                                                                                                                                                              |

**Quality Assurance**

Composition Assessment and Selection: detailed histology composition analysis of section

Gross and Microscopic Review: comprehensive; conducted by a single pathologist

Proximity to Primary Pathology of Interest: tumor central portion

Method of Enrichment for Relevant Component: TMA coring, targeting central region of tumor in block

Details of Enrichment for Relevant Component: n/a

Quality Assurance Measures: n/a

Embedding reagent/medium: unknown

**Supplementary Table S3: Antibodies used for immunohistochemical analysis indicating sources, dilutions used and scoring definitions**

| Antibody | Source               | Host (clone)                | Dilution | Definition of positivity                                          |
|----------|----------------------|-----------------------------|----------|-------------------------------------------------------------------|
| CD74     | Abcam                | Mouse monoclonal (LN2)      | 1:100    | $\geq 20$ H score value (intensity 0–3 $\times$ % positive cells) |
| MHCII    | Affinity Bioreagents | Mouse monoclonal (CR3/43)   | 1:500    | $> 1$ (moderate/strong intensity/ $\geq 10\%$ cells)              |
| CD8      | Cell Marque          | Mouse monoclonal (C8/144B)  | 1:250    | $\geq$ Median (intra-epithelial or intra-stromal cell score)      |
| CD4      | Abcam                | Rabbit monoclonal (EPR6855) | 1:250    | $\geq$ Median (intra-epithelial or intra-stromal cell score)      |
| CD68     | Spring Biosciences   | Rabbit monoclonal (SP251)   | 1:150    | $\geq$ Median (intra-epithelial or intra-stromal cell score)      |
